# Supplementary material for: Concentrated mixed cation acetate “water-in-salt” solutions as green and low-cost high voltage electrolytes for aqueous batteries
Source: Royal Society of Chemistry journal article supplement (doi:10.1039/c8ee00833g), 2018-01-01
Supplement: c8ee00833g1.pdf [file c8ee00833g1.pdf]

## Supporting information

### Concentrated Mixed Cation Acetate “Water-in-Salt” Solutions as Green and Low Cost High Voltage Electrolytes for Aqueous Batteries

Maria R. Lukatskaya<sup>1</sup>, Jeremy I. Feldblyum<sup>1,2</sup>, David G. Mackanic<sup>1</sup>, Franziska Lissel<sup>3</sup>, Dominik L. Michels<sup>4</sup>, Yi Cui<sup>5</sup>, Zhenan Bao<sup>1,\*</sup>

### Contents

1. Supplementary figures S1-S7 and table S1
2. Supplementary text
3. Supplementary references

#### 1. Supplementary figures

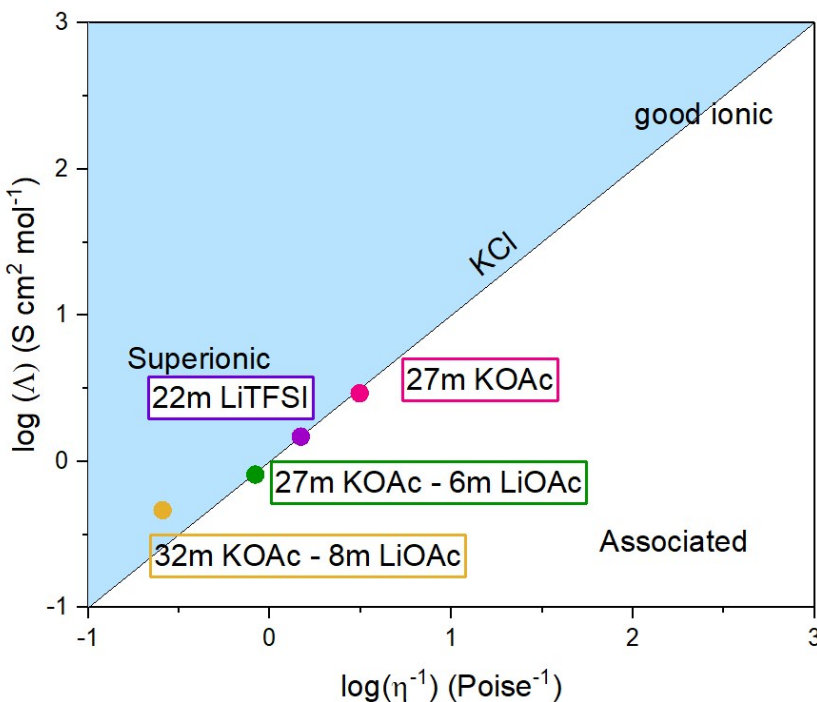

**Figure S1.** Walden plot for 27 m KOAc (pink closed circle), 27 m KOAc – 6 m LiOAc (green closed circles), 32 m KOAc – 8 m LiOAc (yellow closed circles) and 22 m LiTFSI (violet closed circle) at various concentrations at 25 °C. The Walden plot was generated from the molar conductivities ( $\Lambda$ ) and viscosities ( $\eta$ ) of the electrolyte solutions.

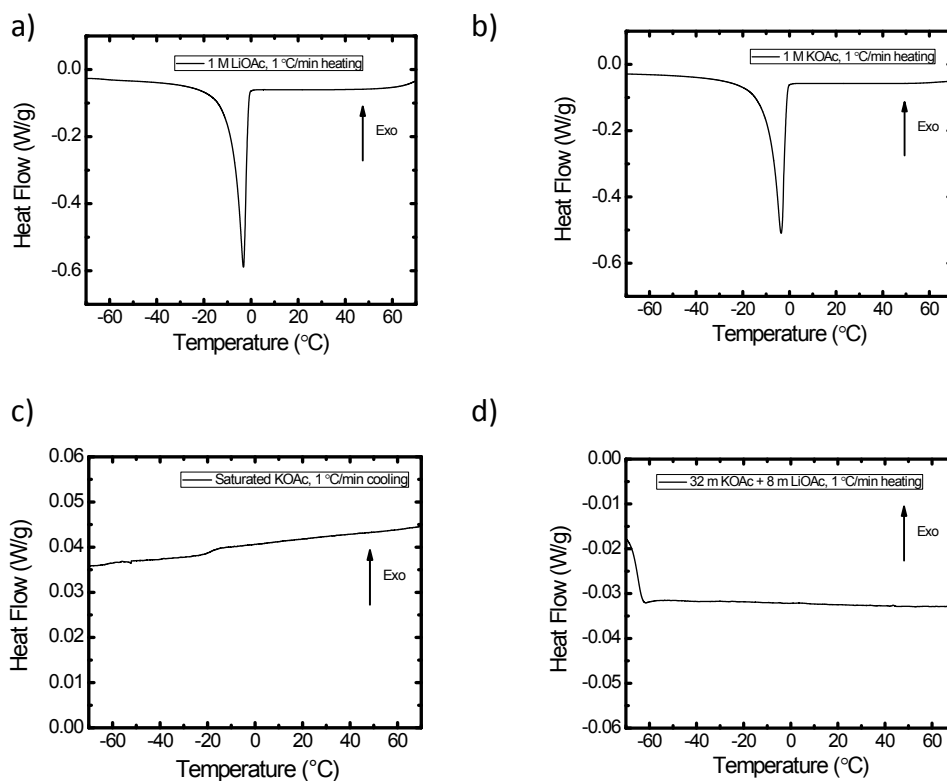

**Figure S2.** Differential scanning thermograms of a) 1 m LiOAc, b) 1 m KOAc, c) saturated aqueous KOAc, and d) the WIS solution of 32 m KOAc – 8 m LiOAc.

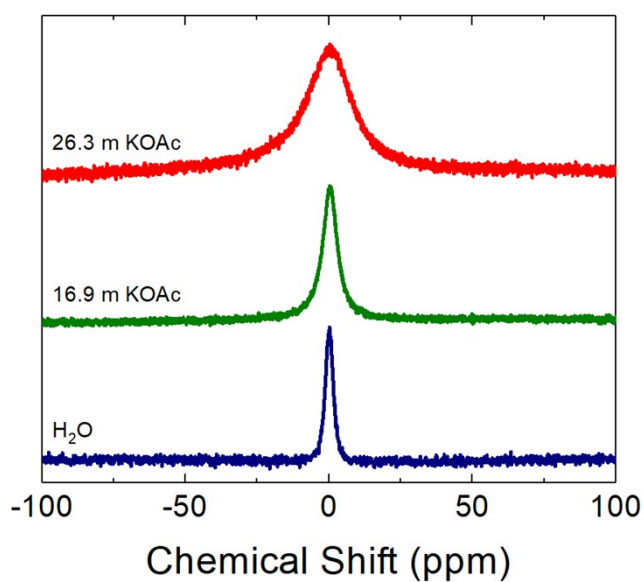

**Figure S3.**  $^{17}\text{O}$  NMR spectra of KOAc solutions. Data are vertically offset and normalized to ease visualization.

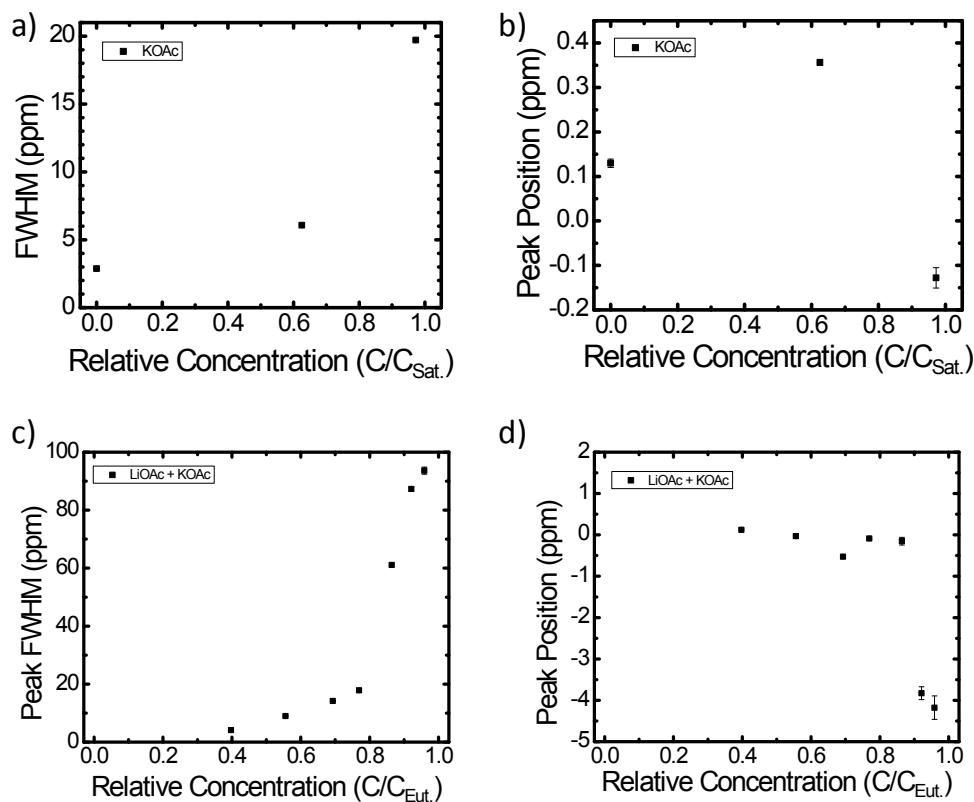

**Figure S4.** (a, b) Trends in  $^{17}\text{O}$  NMR data of LiOAc solutions. Concentration is shown relative to saturation (27 m). (c, d) Trends in  $^{17}\text{O}$  NMR data of LiOAc – KOAc solutions. Concentration is shown relative to the eutectic concentration, 32 m KOAc – 8 m LiOAc.

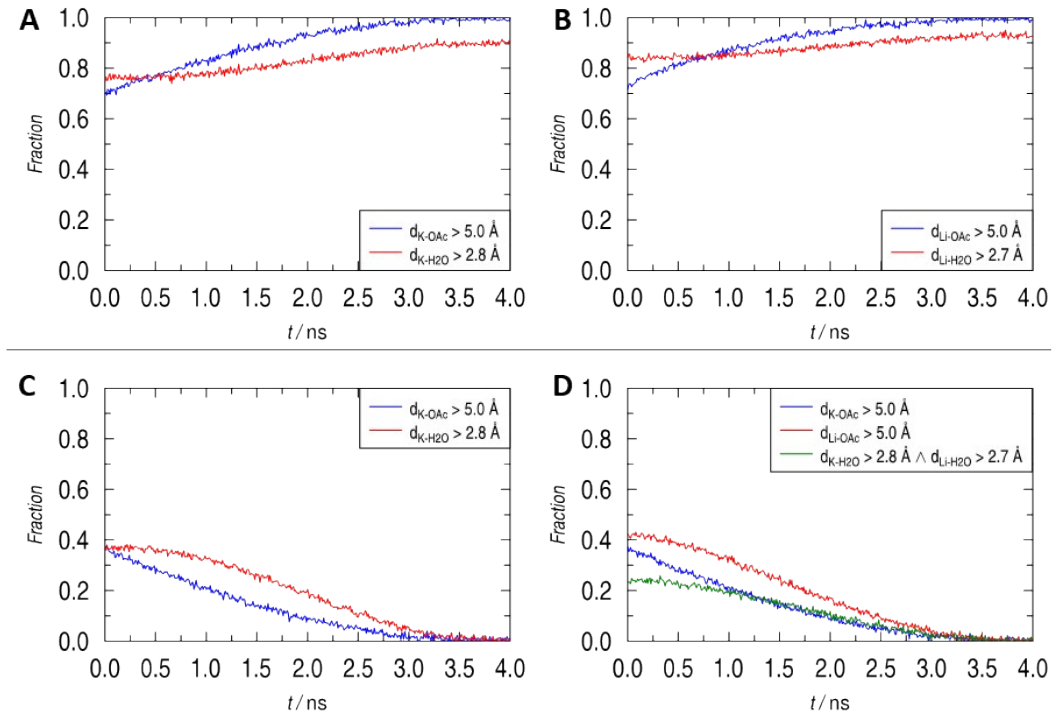

**Figure S5:** Illustration of the composition of the simulated electrolytes as a function of time. From top left to bottom right: (A) 1 m KOAc, (B) 1 m LiOAc, (C) 27 m KOAc, (D) 32 m KOAc–8 m LiOAc.

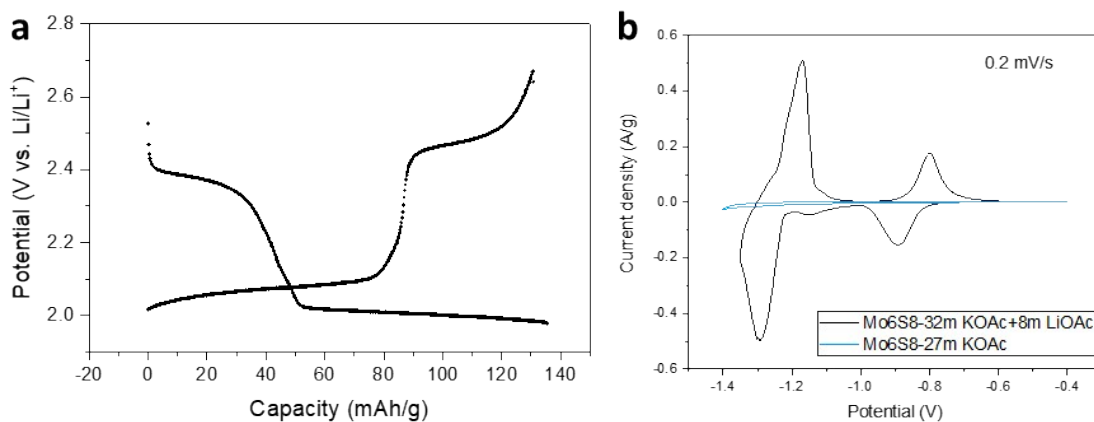

**Figure S6. a,** Galvanostatic charge/discharge profile collected at 0.2 A/g charging rate for  $\text{Mo}_6\text{S}_8$  electrode in 32 m KOAc – 8 m LiOAc solution. **b,** Cyclic voltammetry profiles collected at scan rate of 0.2 mV/s for  $\text{Mo}_6\text{S}_8$  electrodes in 27 m KOAc (blue line) and 32 m KOAc – 8 m LiOAc (black line) solutions.

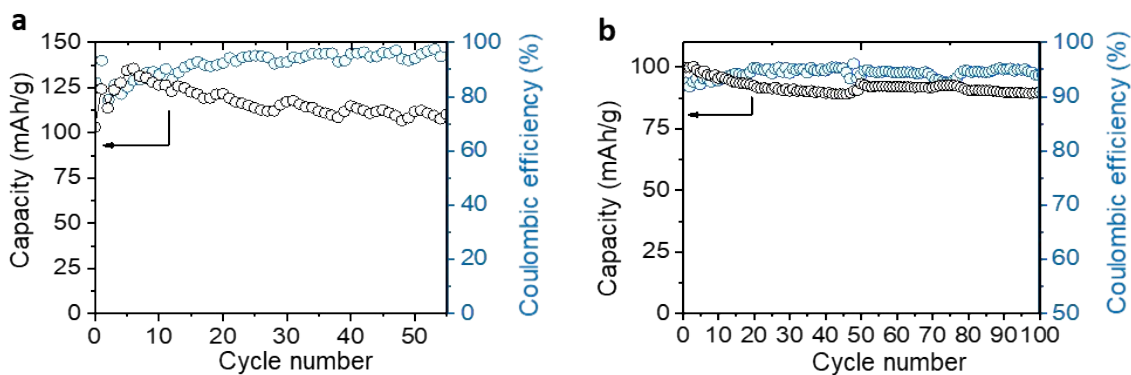

**Figure S7.** Capacity retention data and coulombic efficiency for a,  $c\text{-TiO}_2$  and b,  $\text{LiMn}_2\text{O}_4$  collected at 0.5 C charging rate.

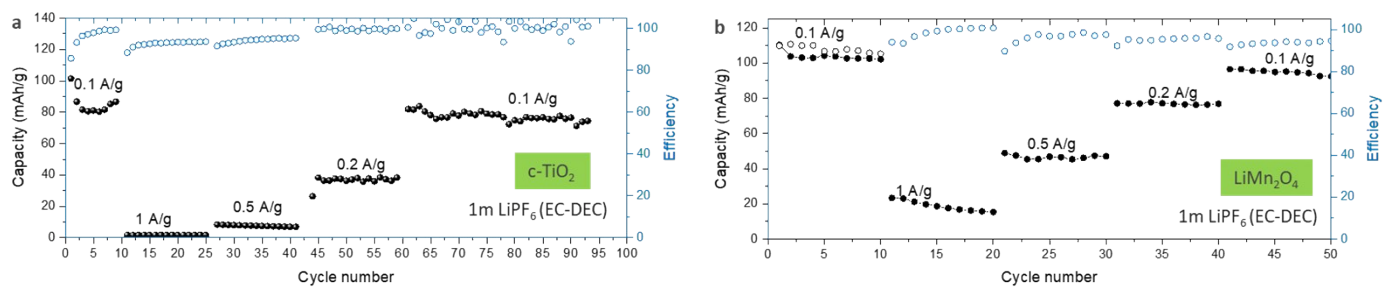

**Figure S8.** Cycling stability and rate performance data for a,  $c\text{-TiO}_2$  anode and b,  $\text{LiMn}_2\text{O}_4$  cathode in 1 m  $\text{LiPF}_6$  (EC-DEC).

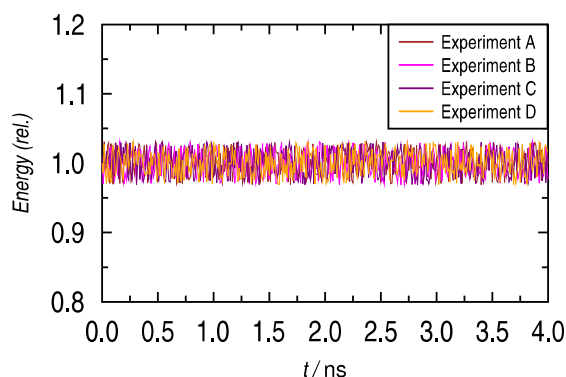

**Figure S9:** Illustration of the temporal evolution of the relative energy during the simulation for the systems (A)-(D).

**Table S1.** Composition of the electrolyte systems analyzed using MD.

| System                    | A        | B         | C       | D                 |
|---------------------------|----------|-----------|---------|-------------------|
| Molarity                  | 1 m KOAc | 1 m LiOAc | 27 KOAc | 32 KOAc + 8 LiOAc |
| Ratio                     |          |           |         |                   |
| Water/KOAc                | 55.5     | -         | 2.1     | 1.7               |
| Water/LiOAc               | -        | 55.5      | -       | 6.9               |
| Number of Water molecules | 333      | 333       | 231     | 187               |
| Number of KOAc molecules  | 6        | -         | 110     | 110               |
| Number of LiOAc molecules | -        | 6         | -       | 27                |

## 2. Supplementary text

### MD simulation results of the acetate water-in-salt system

Experimental data as well as theoretical examinations consistently give the radius of the primary hydration shell of a  $K^+$  ion in an aqueous 6-ligand environment as  $\text{Hyd}_K = 2.8 \text{ \AA}$ , and the hydration shell of  $\text{Li}^+$  as  $\text{Hyd}_{\text{Li}} = 2.7 \text{ \AA}$ .<sup>S1</sup> It has to be noted that for  $\text{Li}^+$  ion, the radius of the hydration shell is reported with more ambiguity, reflecting the transition from 4 to 6 coordinate  $\text{Li}^+$  as well as the non-negligible impact of the second hydration shell on the solvation. Free water, defined as being outside of the hydration shells, can adsorb on the electrode surface. For mono-salt electrolytes, fractions of free water of 0.15 were reported,<sup>S2</sup> while for bi-salt systems mixing two lithium salts, fractions of free water as low as 0.11 were reached.<sup>S3</sup>

After the simulations of electrolytes A (1 m KOAc) and B (1 m LiOAc) reach a structurally stable state at 3 ns, the respective ions in the systems are fully separated by more than  $5 \text{ \AA}$  (see **Figure S5 A and B**, blue), with no interpenetration of the hydration shells. As expected for the low salt concentrations, the bulk of the water molecules is present outside of the respective cationic hydration shells ( $\text{Hyd}_K = 2.8 \text{ \AA}$  and  $\text{Hyd}_{\text{Li}} = 2.7 \text{ \AA}$ ), and the fraction of free water is around 0.9 for system A and 0.95 for system B. The difference reflects the higher average

coordination number of the K<sup>+</sup> ion. The results of the simulations are in accordance with the expected behavior of the electrolytes A and B, which both represent classic salt-in-water systems.

In the simulation of system C, a potassium based electrolyte with a concentration of 27 m KOAc, the hydration shells show a high degree of interpenetration with all water molecules present in at least one hydration shell at any given time. The fraction free water ( $d_{\text{K-H}_2\text{O}} > 2.8 \text{ \AA}$ ) as well as the fraction of separated ion pairs ( $d_{\text{K-OAc}} > 5 \text{ \AA}$ ) approaching 0 after 3 ns (see **Figure S5 C**), The fraction of free water is lower than the reported lithium based mono-salt electrolyte, which is consistent with the higher concentration (27 m KOAc as compared to 22 m LiTFSI) and the higher average coordination number of potassium.

For the highly concentrated mixed-cationic electrolyte D with 32 m KOAc – 8 m LiOAc, the fraction of free water, defined as being outside of a cationic hydration shell with radii  $\text{Hyd}_{\text{K}} = 2.8 \text{ \AA}$  and  $\text{Hyd}_{\text{Li}} = 2.7 \text{ \AA}$  is approaching 0 (see **Figure S5 D**, green) in the stable system reached after a simulation time of 3 ns. Also, the concentration yields a system with a markedly high degree of interpenetration of the hydration shells where the fraction of ions isolated by water is approximating 0 (see **Figure S5 D**, blue and red). Based on the MD simulations, the system can consequently be described as a near-ideal example of a water-in-salt electrolyte.

### 3. Supplementary references

- S1. J. Mähler, I. Persson, *Inorganic Chemistry*, 2012, **51 (1)**, 425-438A
- S2. L. Suo, O. Borodin, T. Gao, M. Olguin, J. Ho, X. Fan, C. Luo, C. Wang and K. Xu, *Science*, 2015, **350**, 938
- S3. L. Suo, O. Borodin, W. Sun, X. Fan, C. Yang, F. Wang, T. Gao, Z. Ma, M. Schroeder, A. von Cresce, S. M. Russell, M. Armand, A. Angell, K. Xu and C. Wang, *Angewandte Chemie International Edition*, 2016, **55**, 7136-7141.
